# Supplementary material for: Phenolic Constituents from Fallopia multiflora (Thunberg) Haraldson
Source: Hindawi journal article supplement (doi:10.1155/2018/4851439), 2018-08-06
Supplement: f1 [file 4851439.f1.docx]

**Supplementary Information**

**Phenolic constituents from *Fallopia multiflora* (Thunberg) Haraldson**

**Nguyen Thi Thoaa,b,c, Pham Thanh Binhb, Nguyen Phuong Thaob, Nguyen Hai Danga,b, Nguyen Van Hungb, Pham Van Cuongb, Chau Van Minhb, Tran Quang Haic, Nguyen Tien Data,d,***

*aGraduate University of Science and Technology, VAST, 18-Hoang Quoc Viet, Cau Giay, Hanoi, Vietnam*

*b Institute of Marine Biochemistry, Vietnam Academy of Science and Technology (VAST), 18-Hoang Quoc Viet, Cau Giay, Hanoi, Vietnam*

*cFaculty of Chemical Technology, Hanoi University of Industry, 298-Cau Dien, Bac Tu Liem, Hanoi, Vietnam*

*dCenter for Research and Technology Transfer, VAST, 18-Hoang Quoc Viet, Cau Giay, Hanoi, Vietnam*

Correspondence should be addressed to Nguyen Tien Dat, ngtiend@imbc.vast.vn

| Figure S1: HR-ESI-MS spectrum of **1**  Figure S2: 1H NMR spectrum of **1**  Figure S3: 13C NMR spectrum of **1**  Figure S4: HSQC spectrum of **1**  Figure S5: HMBC spectrum of **1** |  |
| --- | --- |

Figure S6: HR-ESI-MS spectrum of **3**

Figure S7: 1H NMR spectrum of **3**

Figure S8: 13C NMR spectrum of **3**

Figure S9: HSQC spectrum of **3**

Figure S10: HMBC spectrum of **3**


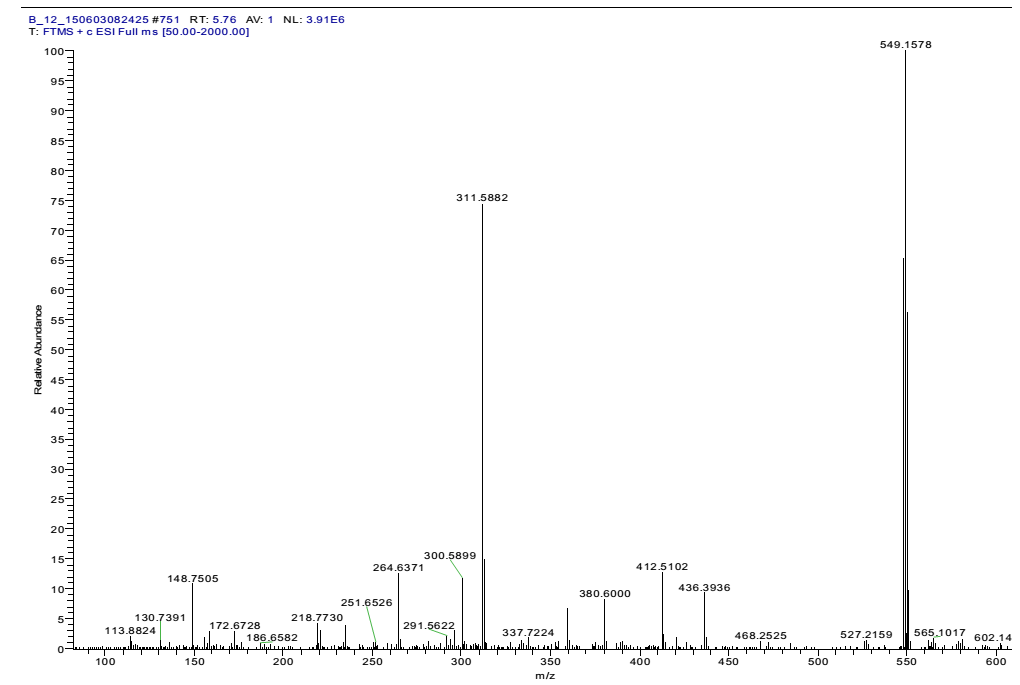


Figure S1: HR-ESI-MS spectrum of **1**


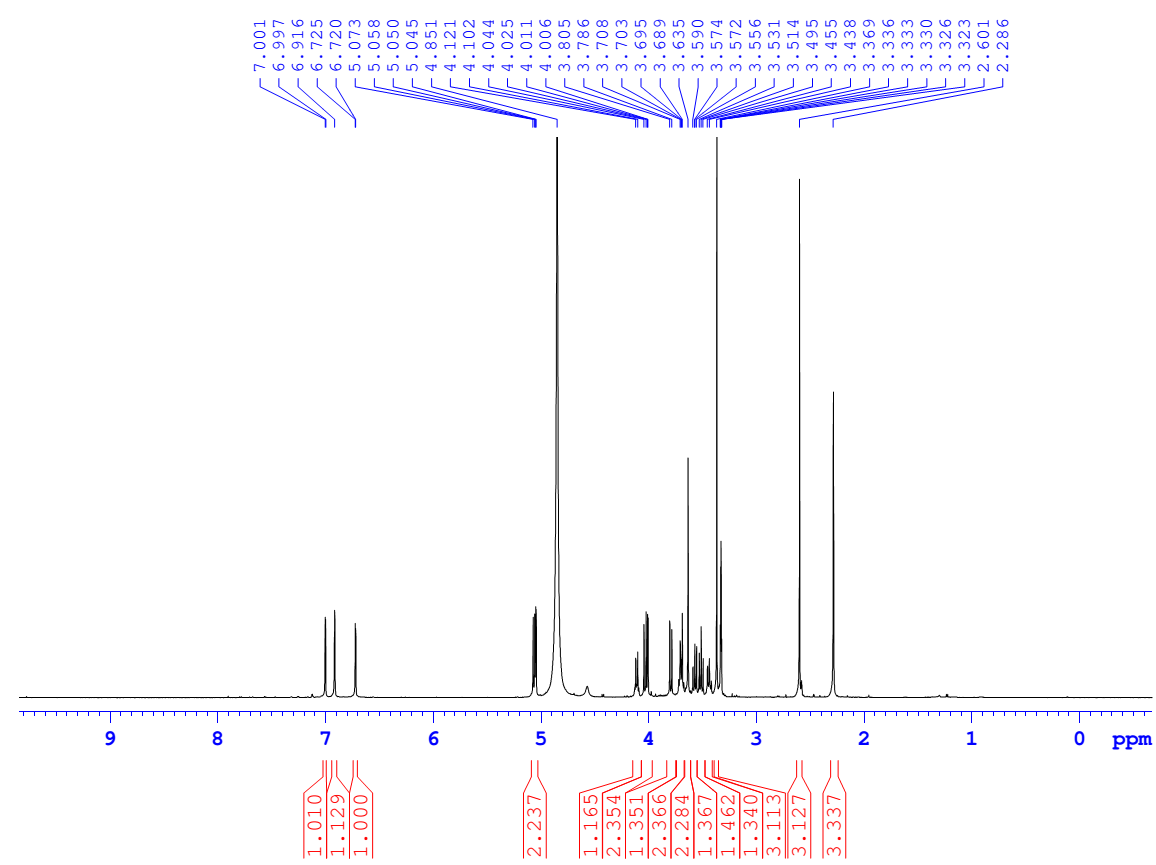


Figure S2: 1H NMR spectrum of **1**


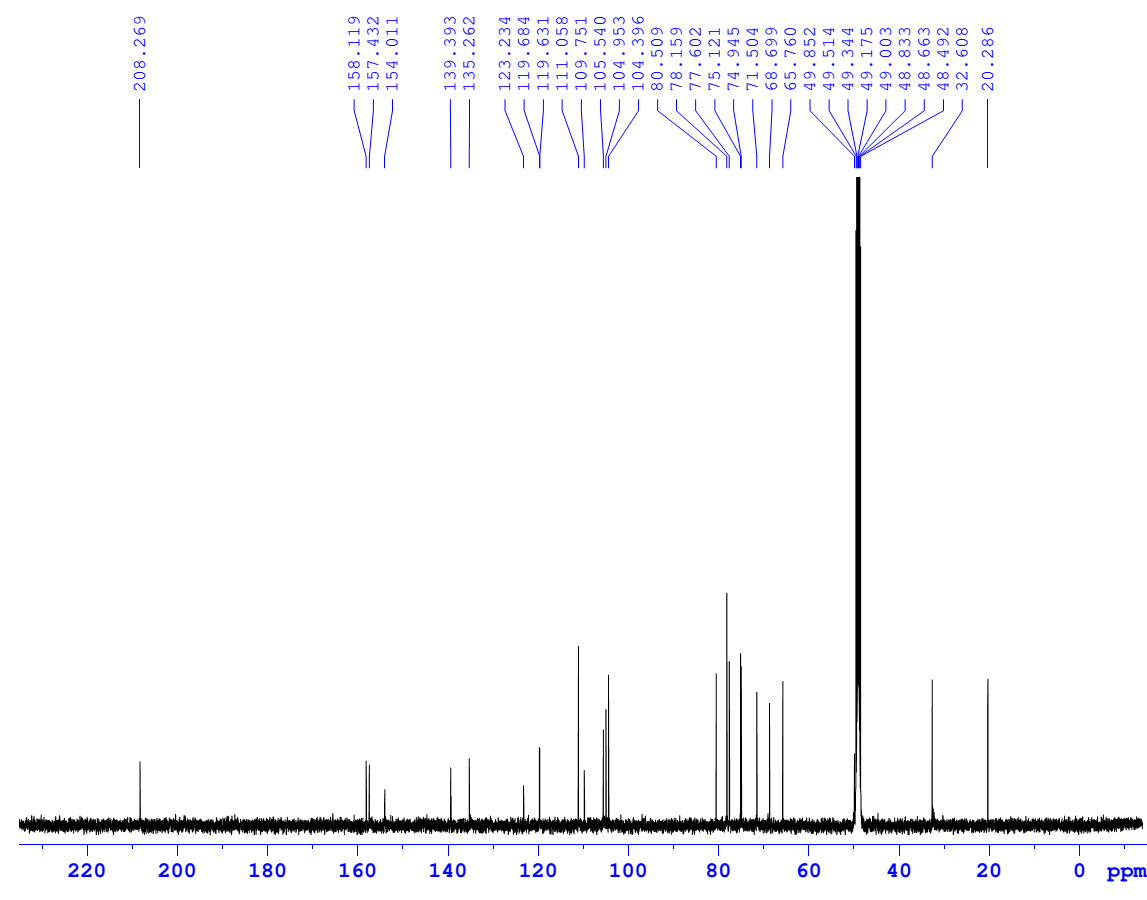


Figure S3: 13C NMR spectrum of **1**


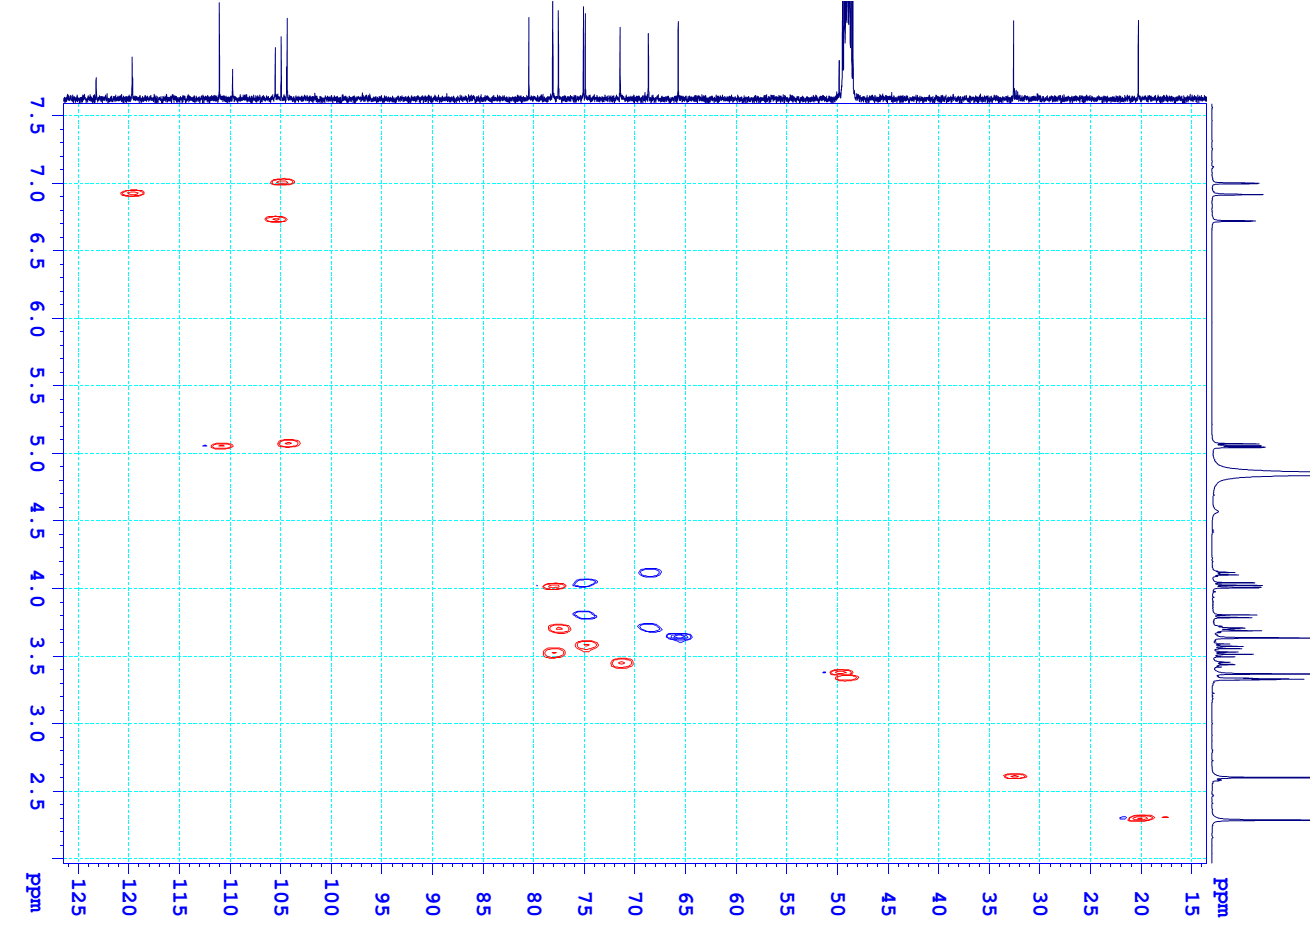


Figure S4: HSQC spectrum of **1**


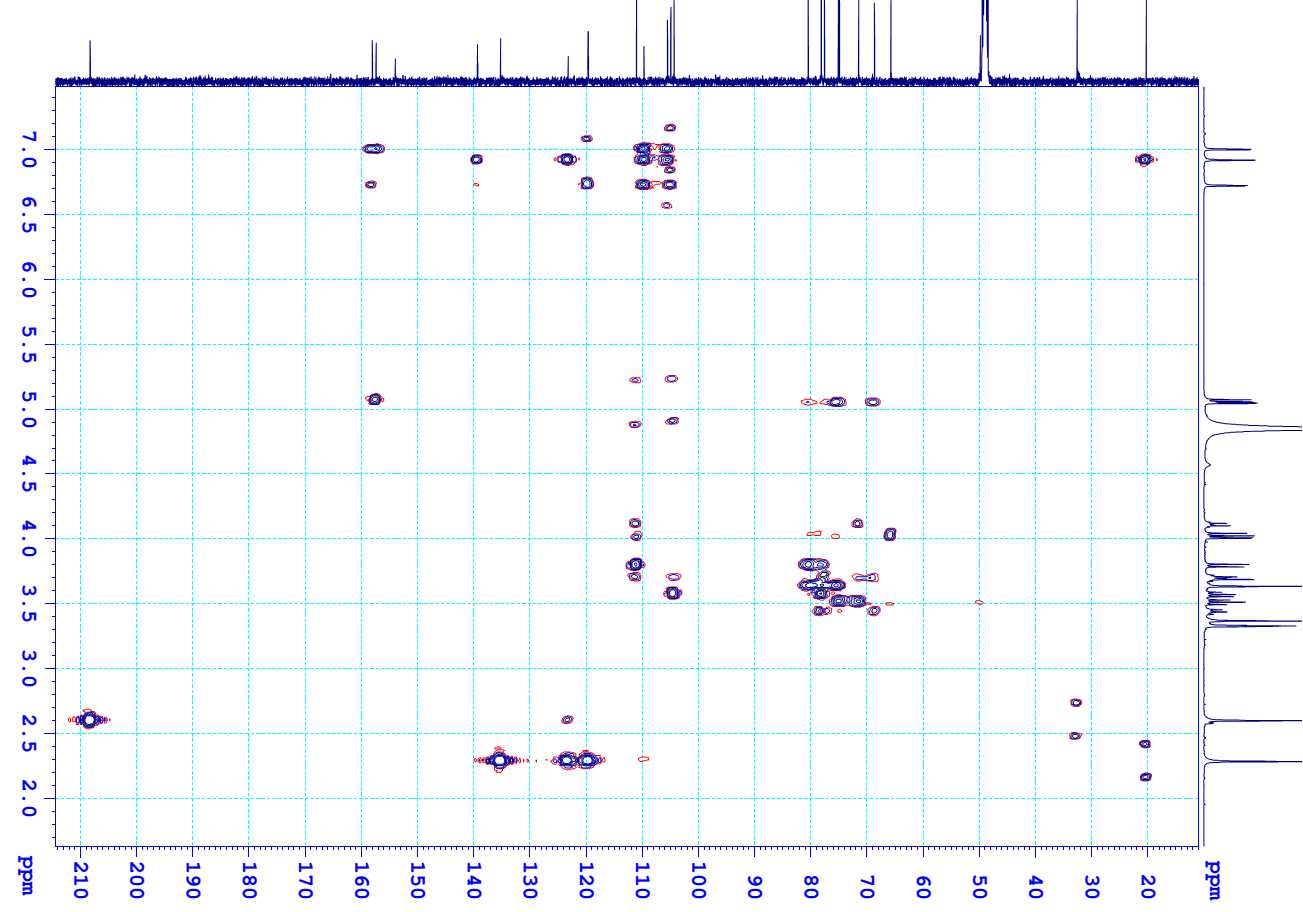


Figure S5: HMBC spectrum of **1**


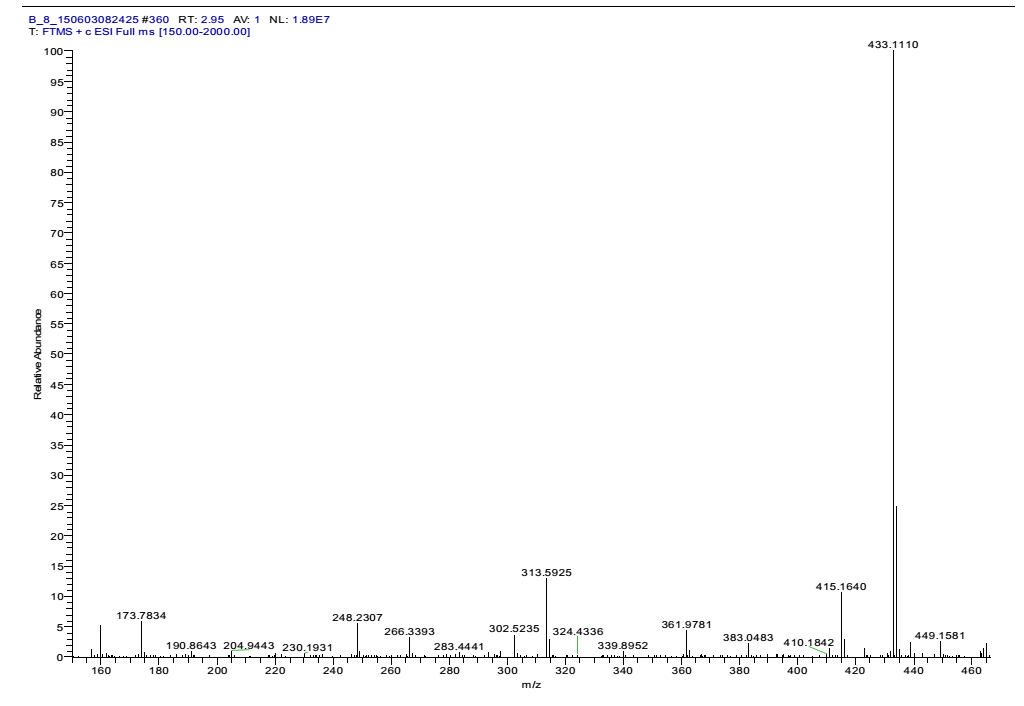


Figure S6: HR-ESI-MS spectrum of **3**

**
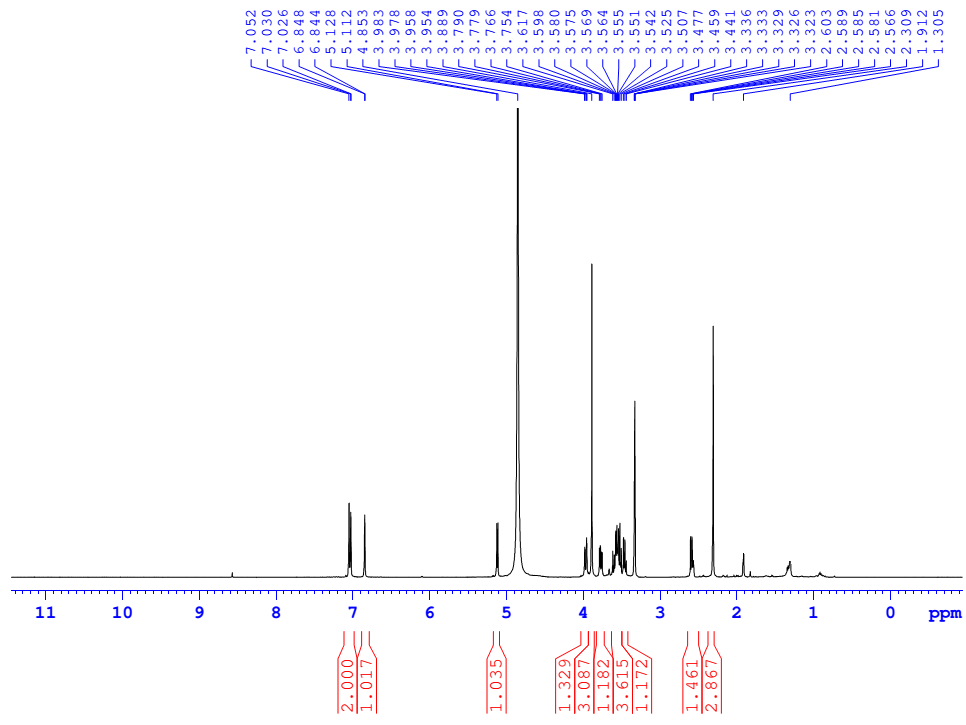
**

Figure S7: 1H NMR spectrum of **3**

**
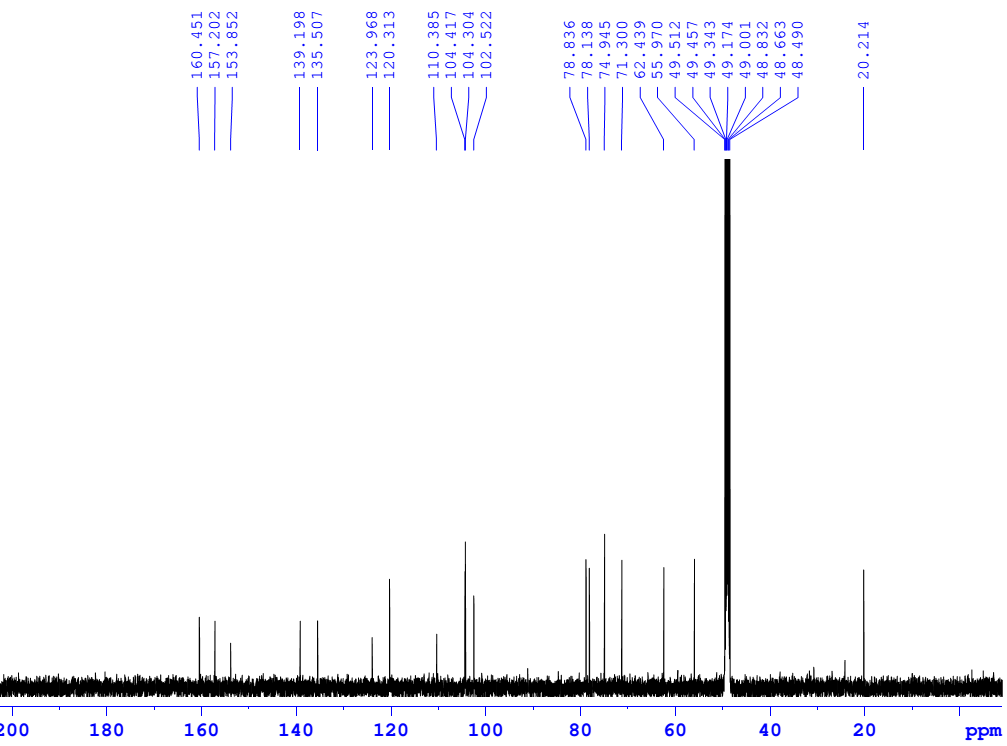
**

Figure S8: 13C NMR spectrum of **3**

**
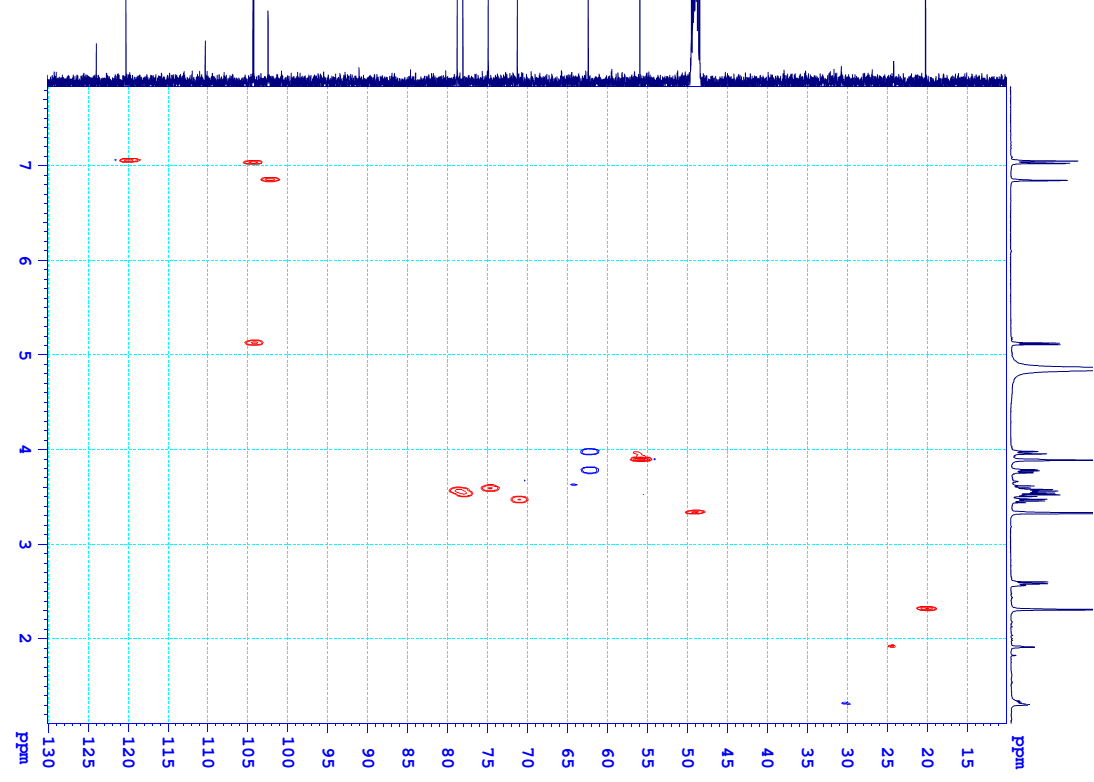
**

Figure S9: HSQC spectrum of **3**

**
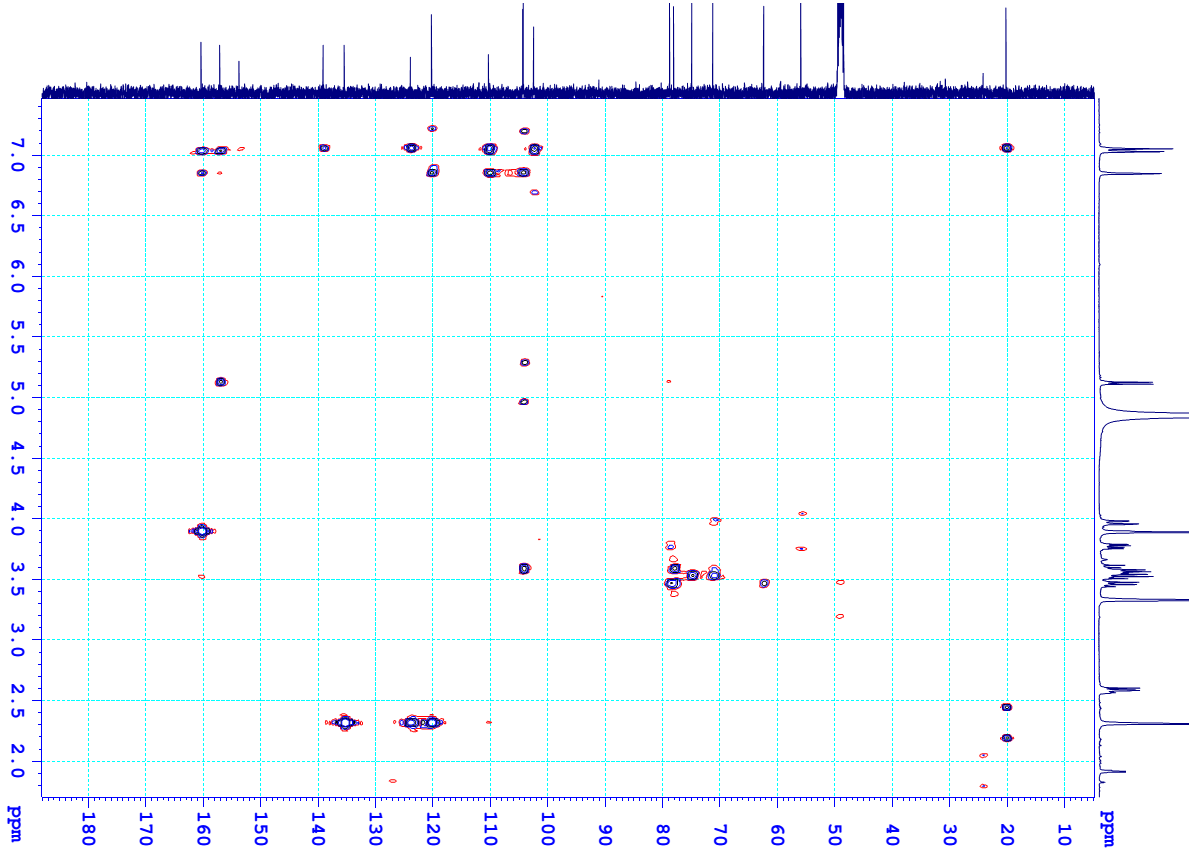
**

Figure S10: HMBC spectrum of **3**
